# Supplementary material
Source: publisher site journal article supplement (https://www.dovepress.com/article/588848)
Supplement: Supplementary file 1 [file 588848_Supplementary%20material%20-revised-58848.docx]

Supplementary Tables

Table S1 Baseline demographic and clinical characteristics in women

| Variables | Derivation and testing cohort (*n*=1705) | External validation cohort (*n*=1475) |
| --- | --- | --- |
| Age, years, M (Q1, Q3) | 32.00 (30.00, 35.00) | 31.00 (28.00, 34.00) |
| BMI, kg/m2, M (Q1, Q3) | 22.44 (20.53, 24.88) | 23.44 (20.94, 26.45) |
| Higher education level, n (%) | 1074 (62.99) | 1055 (71.50) |
| Occupation, n (%) |  |  |
| Unskilled | 773 (45.34) | 653 (44.30) |
| Semi-skilled | 52 (3.05) | 36 (2.40) |
| Skilled | 880 (51.61) | 786 (53.30) |
| AFC, M (Q1, Q3) | 10 (6, 14) | 17.00 (11.50, 25.00) |
| Basal FSH (IU/L), M (Q1, Q3) | 7.03 (5.890, 8.670) | 6.33 (5.30, 7.69) |
| Basal LH (IU/L), M (Q1, Q3) | 5.51 (3.60, 6.36) | 4.59 (3.18, 6.77) |
| Basal E2 (pg/ml), M (Q1, Q3) | 40.50 (29.83, 53.70) | 32.07 (24.10, 45.99) |
| AMH (ng/ml), M (Q1, Q3) | 2.12 (1.07, 3.75) | 2.99 (1.56, 5.15) |
| Endometriomas, n(%) |  |  |
| Non-ovarian masses | 193 (11.32) | 1331 (90.20) |
| Intact unilateral endometriomas | 351 (20.59) | 51 (3.50%) |
| Intact bilateral endometriomas | 150 (8.80) | 7 (0.50%) |
| Sclerotherapy and acupuncture | 14 (0.82) | 0 |
| Unilateral cystectomy and ablation | 665 (39.00) | 62 (4.20) |
| Bilateral cystectomy and ablation | 325 (19.06) | 23 (1.60) |
| Oophorectomy | 7 (0.41) | 1 (0.10) |
| Length of infertility (years), M (Q1, Q3) | 3.00 (2.00, 4.50) | 3.00 (2.00, 4.00) |
| Hysteroscopy, n (%) |  |  |
| Normal | 1121 (67.9) | 728 (52.80) |
| Intrauterine adhesions | 41 (2.5) | 67 (4.90) |
| Endometrial polyps/submucosal fibroids | 450 (27.3) | 432 (31.3) |
| Uterine malformations | 14 (0.8) | 7 (0.5) |
| Scarring diverticulum | 12 (0.7) | 88 (6.4) |
| Two types of anomalies | 12 (0.7) | 57 (4.1) |
| Ovarian stimulation protocol, n (%) |  |  |
| Natural cycle or modified natural cycle | 51 (2.99) | 3 (0.2) |
| GnRH agonist protocol | 1178 (69.09) | 579 (39.3) |
| GnRH antagonist protocol | 363 (21.29) | 801 (54.3) |
| Others | 113 (6.63) | 92 (6.2) |
| Days of stimulation, M (Q1, Q3) | 10 (9, 11) | 11.00 (10.00, 12.00) |
| Gn starting dose (IU), M (Q1, Q3) | 175 (150, 225) | 600 (600, 900) |
| Total Gn dose (IU), M (Q1, Q3) | 2025 (1500, 2850) | 2175 (1650, 2700.50) |
| Endometrial thickness on hCG day (cm), M (Q1, Q3) | 1.1 (0.95, 1.25) | 1.15 (1.00, 1.30) |
| Number of retrieved oocytes, M (Q1, Q3) | 8 (4, 12) | 9 (6,12) |
| Number of 2PN zygotes, M (Q1, Q3) | 5 (2, 8) | 5 (3,8) |
| Number of blastocysts, M (Q1, Q3) | 2 (1, 4) | 2 (1,4) |

*Note:* M: Median, Q1:1st Quartile, Q3: 3rd Quartile

ART, assisted reproductive technology; BMI, body mass index; AFC, antral follicle count; FSH, follicle-stimulating hormone; LH, luteinizing hormone; E2, estradiol; AMH, anti-Müllerian hormone; GnRH, gonadotrophin releasing hormone; hCG, human chorionic gonadotropin; 2PN, 2-pronuclear.

Table S2 Predictive LASSO model-1 of successful live births （lambda.1se= 0.04）

| Variable | OR | 95%CI |
| --- | --- | --- |
| Age, years | 0.93 | 0.90-0.95 |
| AFC | 1.02 | 0.99- 1.04 |
| Ovarian endometriomas | 0.92 | 0.87-0.98 |
| Endometrial thickness on hCG day (cm) | 2.16 | 1.32-3.58 |
| Number of 2-pronuclear zygotes | 1.22 | 1.17-1.26 |

*Note:* OR,odds ratio; 95% CI, 95% confidence interval; LASSO, least absolute shrinkage and selection operator; AFC, antral follicle count.

Table S3 Predictive LASSO model-2 of successful live births （lambda.min= 0.004）

| Variable | OR | 95%CI |
| --- | --- | --- |
| Age, years | 0.99 | 0.98-1.00 |
| BMI, kg/m2 | 1.00 | 0.99-1.00 |
| Occupation | 0.98 | 0.96-1.01 |
| AFC | 1.00 | 1.00- 1.01 |
| Basal FSH (IU/L) | 0.99 | 0.98-1.00 |
| Basal LH (IU/L) | 1.01 | 1.00-1.01 |
| Basal E2 (pg/ml) | 1.00 | 1.00-1.00 |
| AMH (ng/ml) | 0.99 | 0.98-1.01 |
| Endometriosis cysts | 0.98 | 0.97-1.00 |
| Duration of infertility (years) | 1.00 | 0.99-1.01 |
| Hysteroscopy | 0.99 | 0.96-1.01 |
| Ovarian stimulation protocol | 0.96 | 0.93-1.00 |
| Days of stimulation | 1.02 | 1.01-1.04 |
| Total gonadotropin dose (IU) | 1.00 | 1.00-1.00 |
| Endometrial thickness on hCG day (cm) | 1.16 | 1.04-1.28 |
| Number of 2PNzygotes | 1.03 | 1.02-1.04 |
| Number of blastocysts | 1.00 | 1.00-1.-2 |

*Note:* OR,odds ratio; 95% CI, 95% confidence interval;

BMI, body mass index; AFC, antral follicle count; FSH, follicle-stimulating hormone; LH, luteinizing hormone; E2, estradiol; AMH, anti-Müllerian hormone; GnRH, gonadotrophin releasing hormone; hCG, human chorionic gonadotropin; 2PN, 2-pronuclear zygotes.

Supplementary figures and legends


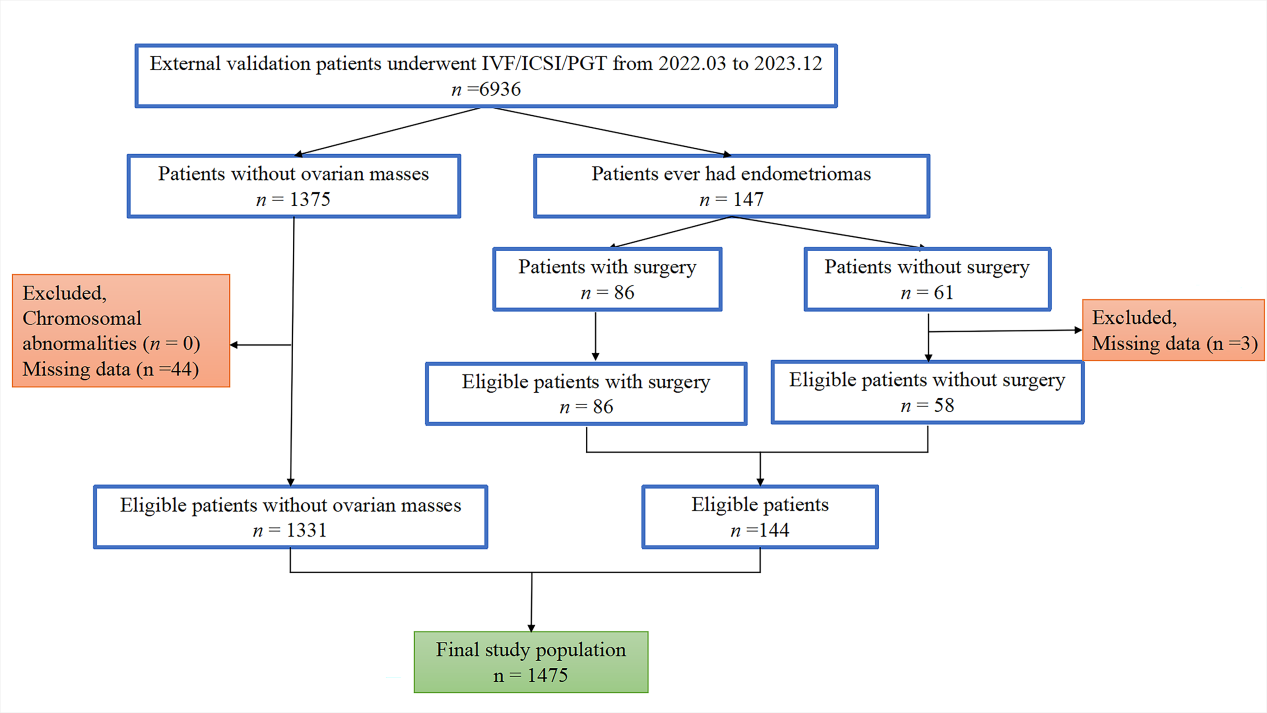


**Figure S1: The flowchart for the selection of external validation patients**

IVF; in vitro fertilization; ICSI; intracytoplasmic sperm injection; PGT; preimplantation genetic testing;


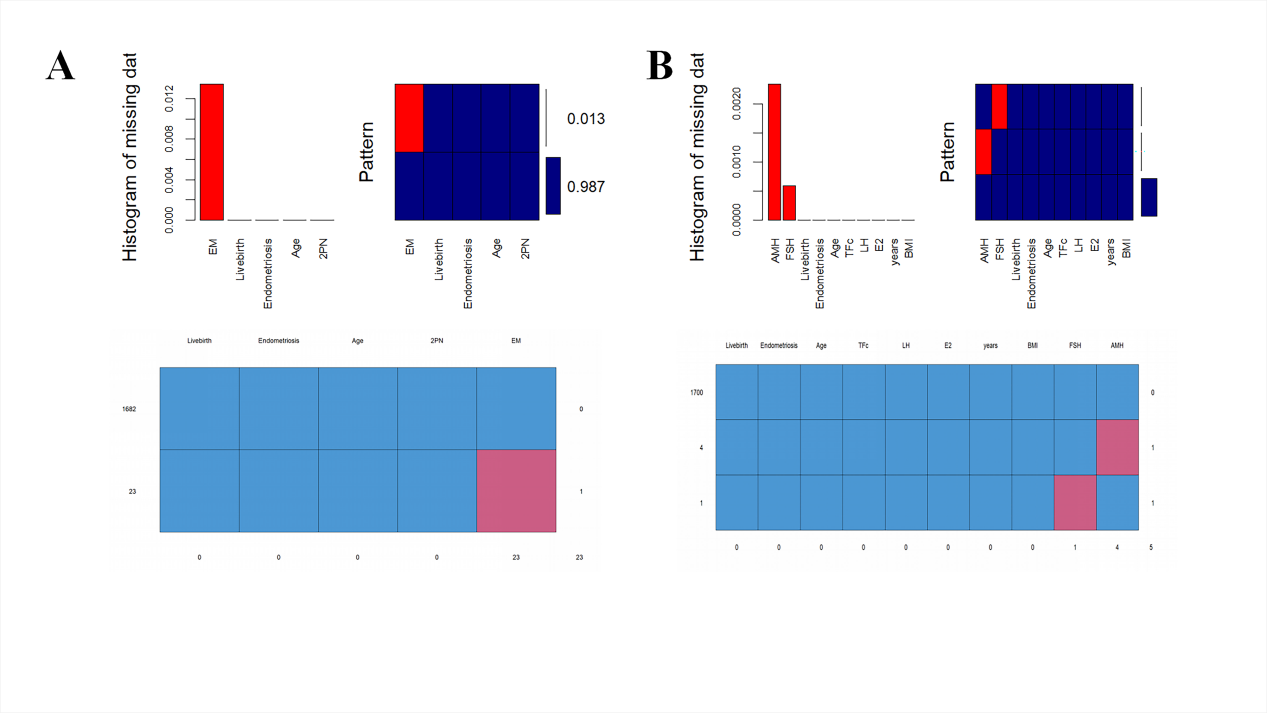


**Figure S2: The specific distributions of missing data values in model-1 and model-2**

A. Distribution of missing data values in model-1; B. Distribution of missing data values in model-2. 2PN, 2-pronuclear zygotes; EM, endometrial thickness on trigger day; AMH, anti-Müllerian hormone; FSH, follicle-stimulating hormone; TFC, total antral follicle count; LH, luteinizing hormone; BMI, body mass index; E2, estradiol; years, length of infertility.


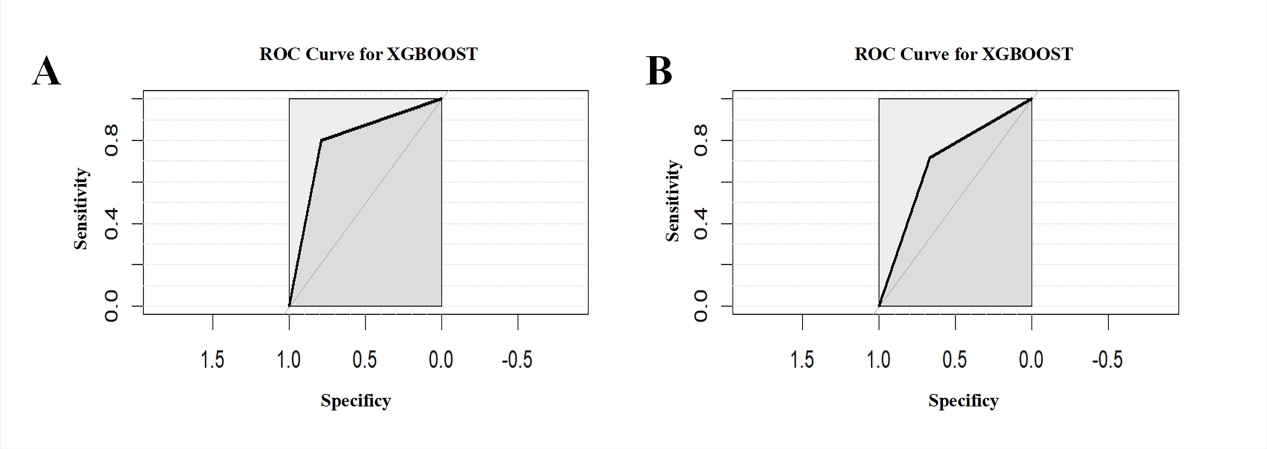


**Figure S3: ROC curves for the XGBoost models in external validation cohort**

A. The ROC curves of the XGBoost model for CLB prediction based on model-1 with 4 variables. Model-1 maintained an AUC of 0.80 (95% CI: 0.76–0.83). B. The ROC curves of the XGBoost model for CLB prediction based on model-2 with 9 variables. Model-2 achieved an AUC of 0.69 (95% CI: 0.65–0.73). ROC, receiver operating characteristic; XGBoost, extreme gradient boosting; AUC, area under the curves; CLB, cumulate live birth.
